# Supplementary material for: Contraceptive use, both oral and parenteral, is associated with increased arterial stiffness in young healthy women
Source: Research Square preprint supplement (doi:10.21203/rs.3.rs-5018497/v1), 2024-10-16
Supplement: Supplementary file 1 [file fc6f8cb485926d601c1ade4f.docx]

**Tables – Contraceptive use, both oral and parenteral, is associated with increased arterial stiffness in young healthy women**

**TABLE 1**
**Hormonal contraceptive types used in the study population**

|  |  | | | | |  |  |  |  |  |
| --- | --- | --- | --- | --- | --- | --- | --- | --- | --- | --- |
|  | *n* (%) |  | PWV (mean±SD) |  | AIx (mean±SD) |  |  | cIMT (mean±SD) |  | SHBG, nmol/L (mean±SD) |
| No contraceptive | 355 (62) |  | 5.1±0.70 |  | -4.9±10.0 |  |  | 0.50±0.058 |  | 42±33 |
|  |  |  |  |  |  |  |  |  |  |  |
| Vaginal contraceptive | 18 (3.1) |  | 5.5±0.65 |  | -4.6±9.7 |  |  | 0.48±0.046 |  | 90±38 |
|  |  |  |  |  |  |  |  |  |  |  |
| Intrauterine contraceptive | 15 (2.6) |  | 5.3±0.56 |  | -2.7±10.0 |  |  | 0.50±0.046 |  | 22±6.0 |
|  |  |  |  |  |  |  |  |  |  |  |
| Subcutaneous contraceptive | 22 (3.8) |  | 5.5±0.89 |  | -5.7±11.3 |  |  | 0.49±0.064 |  | 25±8.8 |
|  |  |  |  |  |  |  |  |  |  |  |
| Oral contraceptive | 166 (29) |  | 5.3±0.72 |  | -5.0±9.5 |  |  | 0.49±0.054 |  | 39±31 |
|  |  |  |  |  |  |  |  |  |  |  |
| Transdermal contraceptive | 1 (0.2) |  | 5.6 |  | -9.7 |  |  | 0.55 |  | 126 |
| *p* value |  |  | 0.50 |  | 0.88 |  |  | 0.59 |  | <0.001 |
|  |  |  |  |  |  |  |  |  |  |  |
|  |  |  |  |  |  |  |  |  |  |  |

|  | **TABLE 2  Characteristics of contraceptive users (CU) and non-users (CNU)** | | | |  |  |
| --- | --- | --- | --- | --- | --- | --- |
|  | |  |  |  |  |  |
|  | | NCU, *n* = 355 |  | CU, *n* = 222 |  | *P* value |
| Age | | 22±2.0 |  | 22±1.8 |  | n.s. |
| Systolic blood pressure (mmHg) | | 110±9.4 |  | 112±8.3 |  | 0.0021 |
| BMI (kg/m2) | | 22±3.7 |  | 22±3.4 |  | n.s. |
| LDL-CH (mmol/L) | | 2.2±0.67 |  | 2.5±0.76 |  | <0.001 |
| HDL-CH (mmol/L) | | 1.5±0.36 |  | 1.4±0.38 |  | n.s. |
| Triglycerides (mmol/L) | | 0.75±0.32 |  | 0.91±0.41 |  | <0.001 |
| Non-HDL-CH (mmol/L) | | 2.8±0.73 |  | 2.9±0.74 |  | 0.030 |
| Fasting serum insulin (mIE/L) | | 7.8±4.6 |  | 8.2±4.4 |  | n.s. |
| CRP (mg/L) | | 1.3±2.3 |  | 2.9±5.6 |  | <0.001 |
| SHBG | | 42±33 |  | 62±47 |  | <0.001 |
| Pulse-wave velocity | | 5.1±0.69 |  | 5.3±0.72 |  | <0.001 |
| Augmentation index | | -4.9±10.0 |  | -5.1±10.0 |  | n.s. |
| cIMT | | 0.49±0.058 |  | 0.49±0.054 |  | n.s. |
|  | |  |  |  |  |  |

n.s. = non-significant (p = > 0.05); BMI, body mass index, LDL-CH, low density lipoprotein cholesterol; HDL-CH, high density lipoprotein cholesterol, non-HDL-CH = total cholesterol – HDL-CH, CRP, C-reactive protein.

|  | **TABLE 3  Characteristics of users of estrogen containing contraceptives(EU) vs non-users (NEU)** | | | |  |  |
| --- | --- | --- | --- | --- | --- | --- |
|  | |  |  |  |  |  |
|  | | NEU, *n* = 428 |  | EU , *n* = 149 |  | P value |
| Age | | 22±2.0 |  | 22±1.8 |  | n.s. |
| Systolic blood pressure (mmHg) | | 110±9.0 |  | 113±8.7 |  | 0.0015 |
| BMI (kg/m2) | | 22±3.8 |  | 22±3.1 |  | n.s. |
| LDL (mmol/L) | | 2.2±0.65 |  | 2.6±0.82 |  | <0.001 |
| HDL (mmol/L) | | 1.4±0.36 |  | 1.5±0.38 |  | n.s. |
| Triglycerider (mmol/L) | | 0.75±0.32 |  | 1.0±0.40 |  | <0.001 |
| Non-HDL (mmol/L) | | 2.8±0.71 |  | 3.0±0.78 |  | 0.0020 |
| Fasting serum insulin (mIE/L) | | 8.0±4.6 |  | 7.9±4.0 |  | n.s. |
| CRP (mg/L) | | 1.3±2.2 |  | 3.7±6.6 |  | <0.001 |
| SHBG | | 39±31 |  | 80±47 |  | <0.001 |
| Pulse-wave velocity | | 5.2±0.70 |  | 5.4±0.74 |  | <0.001 |
| Augmentation index | | -4.9±10.0 |  | -5.1±10.0 |  | n.s. |
| cIMT | | 0.50±0.058 |  | 0.49±0.053 |  | n.s. |
|  | |  |  |  |  |  |

**TABLE 4**
**Linear regression. Associations between hormonal contraceptive use (CU vs NCU) and PWV.**

|  |  | | | | |
| --- | --- | --- | --- | --- | --- |
|  | Std Βcontraceptive (95% CI) |  | R2 |  | *p* |
| Univariate | 0.15 (0.096-0.34) |  | 0.020 |  | <0.001 |
|  |  |  |  |  |  |
| Model 1 | 0.14 (0.094-0.33) |  | 0.076 |  | <0.001 |
|  |  |  |  |  |  |
| Model 2 | 0.11 (0.051-0.28) |  | 0.13 |  | 0.0047 |
|  |  |  |  |  |  |
| Model 3 | 0.092 (0.026-0.27) |  | 0.13 |  | 0.0030 |
|  |  |  |  |  |  |

Model 1 includes, in addition to use or non-use of contraceptives, BMI and age.
Model 2 includes, in addition to Model 1, and systolic blood pressure.
Model 3 includes, in addition to Model 2, SHBG and CRP.

**TABLE 5**
**Linear regression. Associations between estrogen containing contraceptive use (EU vs NEU) and PWV.**

|  |  | | | | |
| --- | --- | --- | --- | --- | --- |
|  | Std Βcontraceptive (95% CI) |  | R2 |  | *p* |
| Univariate | 0.14 (0.097-0.36) |  | 0.018 |  | <0.001 |
|  |  |  |  |  |  |
| Model 1 | 0.16 (0.13-0.38) |  | 0.080 |  | <0.001 |
|  |  |  |  |  |  |
| Model 2 | 0.12 (0.064-0.32) |  | 0.14 |  | 0.0032 |
|  |  |  |  |  |  |
| Model 3 | 0.10 (0.024-0.31) |  | 0.14 |  | 0.023 |
|  |  |  |  |  |  |

Model 1 includes, in addition to use or non-use of contraceptives, BMI and age.
Model 2 includes, in addition to Model 1, and systolic blood pressure.
Model 3 includes, in addition to Model 2, SHBG and CRP.
